## Assessment of the impact of island development on water security based on the elements nexus for the water system in Zhoushan archipelago

Qizheng Tong <sup>a</sup>, Chao Fan <sup>b,c,\*</sup>, Xiyong Hou <sup>b</sup>, Feng Gui<sup>a</sup> and Liqing Ma <sup>d</sup>

<sup>a</sup> School of Marine Science and Technology, Zhejiang Ocean University, Zhoushan 316022, China

<sup>b</sup> Chinese Academy of Sciences, Yantai Institute of Coastal Zone Research, Yantai, 264003, China

<sup>c</sup> University of Chinese Academy of Sciences, Beijing 100049, China

<sup>d</sup> School of Economics and Management, Zhejiang Ocean University, Zhoushan 316022, China

\*Corresponding author. E-mail: fanchao20@mails.ucas.ac.cn

 QT, 0000-0002-7116-522X; CF, 0000-0003-4956-7764; XH, 0000-0003-4518-8230; LM, 0000-0002-0314-8823

### ABSTRACT

Water security is the premise for island sustainable development. Rapid urbanization and rising tourism industry have reshaped the water system in China's island cities, and it is necessary to reveal the characteristics of the aforementioned impacts in relation to strength and duration. Here, we present a framing to interpret the nexus between island developments and water security. Subsequently, their coevolutionary trend and mutual impact effects (coupling coordination degree and response period) were measured by mathematical models, respectively. Results demonstrated that the equilibrium of the water system has shifted from nature- to human-dominated since 2010. Interestingly, the coupling coordination degree between water security and island development showed an upward increasing trend, across the study periods. Moreover, water security exhibited positive and negative shock responses to tourism and urbanization, over 1- and 7-year response periods, respectively. Overall, the findings from this case study provide a quantitative paradigm for island sustainable management, and are expected to inform local decision makers on warning signals of sustainability loss, at a temporal scale.

**Key words:** coordination, island, nexus, resilience, socio-ecological system, water security

### HIGHLIGHTS

- Nested links deeply interpret the nexus between island development and water security.
- The impact of island development on water security was quantified by mathematical models.
- Trigger points of the water crisis were detected by the coevolutionary trend of the tourism-urbanization-water security (TUW) system.

## GRAPHICAL ABSTRACT

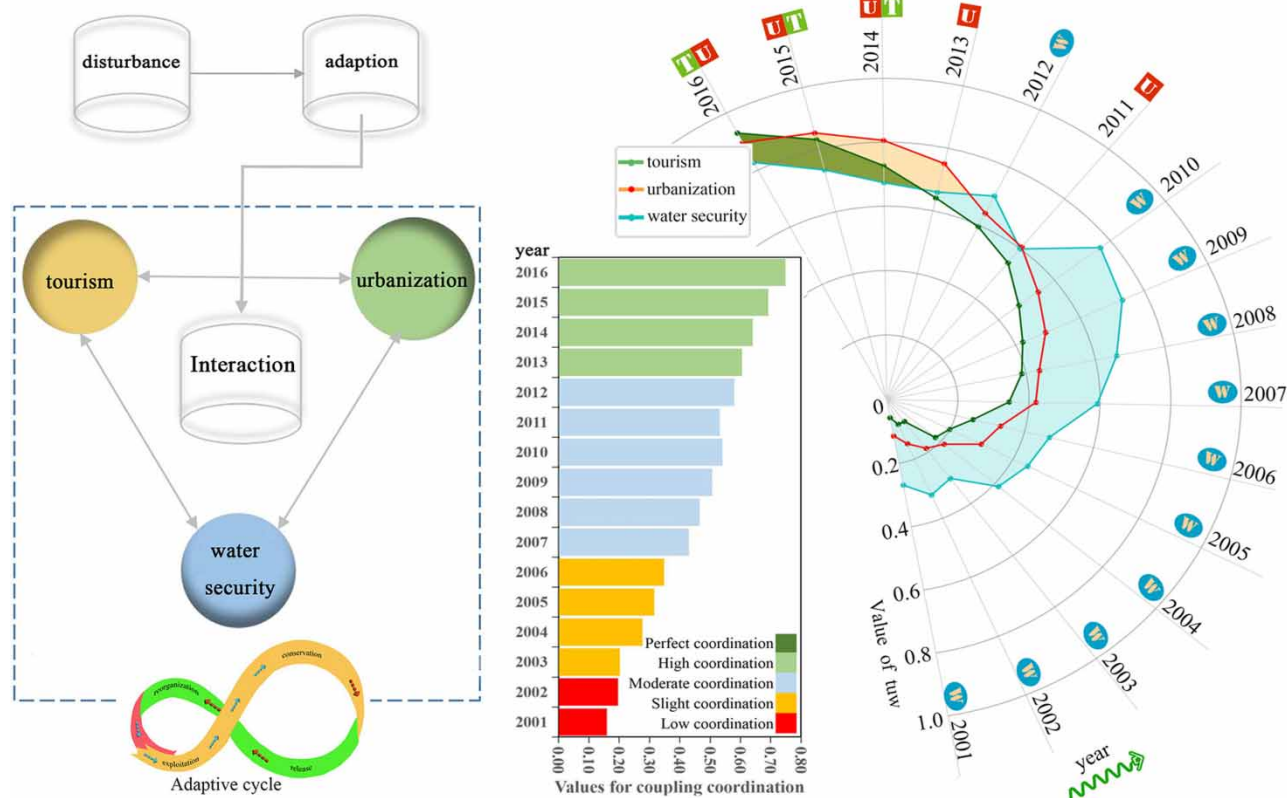

## 1. INTRODUCTION

Currently, widespread concern over island water crises derives from rapid economic development (Diamantopoulou & Voudouris 2008; Strauß 2011). Rapid industrialization and urbanization in many small island developing states (SIDS) are often achieved at the expense of ecology (Heinrich Blechinger & Shah 2011; Monrose & Tota-Maharaj 2018). At a regional dimension, notable conflicts are in place between China's island development and water security (Ni *et al.* 2012; Luo *et al.* 2018), resulting in frequent emergencies in relation to water resources (Gu *et al.* 2018).

Previous attribution research with respect to island water crises has focused on the human-environment aspect, and mosaic human beings into the island water system, when diagnosing trigger mechanism of island water security issues (South *et al.* 2004; van der Velde *et al.* 2007; White *et al.* 2007; Smith 2008; Schwerdtner Máñez *et al.* 2012). However, a qualitative description of the impact effect is a critical issue in these studies, which jeopardizes the objectivity of results. Therefore, developing methods for the quantitative expression of the impact of island development on water security has become a critical topic to serve regulations.

Nested links in relation to system thinking provide a useful bridge for the quantitative assessment of abstract relationships for different elements. Quantitative assessment for the impact of island development on water security calls for integrated construction of various inner elements to form an interlinked nexus (Liu *et al.* 2015). Nexus framing is a classical nested link that focuses on unpacking relationships among multiple inner elements and emphasizes the shifts in coupled human-environment systems (Liu *et al.* 2018; Stringer *et al.* 2018). Nested links between system elements deeply interpret the impact mechanism of ecosystems, resources, the environment and human well-being (Lehmann 2018; Li *et al.* 2019; Wang *et al.* 2021). Among all related inner elements on islands, tourism, urbanization, and water security are the key interconnected components to maintain island resilience (Diamantopoulou & Voudouris 2008; Moglia *et al.* 2008; Chen *et al.* 2020; Ma *et al.* 2020). The tourism-urbanization-water security (TUV) nexus on islands highlights interconnections between

its components in terms of system succession. The TUV nexus presents a conceptual approach to interpret the nexus between inner elements of a coupled system, which is the basic premise for quantifying their impact effect.

From the perspective of interlinked elements, we aimed to interpret the connection of island development and water security, and conducted a comprehensively quantified analysis of the impact of island development on water security in Zhoushan, an island city in mainland China. We abstracted the aforementioned elements into virtual nodes for a socio-ecological system, and used virtual nested links to interpret their relationship. The element nexus was a premise for quantitative assessment of their impact effect. Subsequently, we presented mathematical models to assess these virtual nodes and their response relationships. Overall, this study provided decision makers with a new paradigm to reveal the trigger mechanism of the water crisis to serve island regulation and planning.

## 2. MATERIALS AND METHODS

### 2.1. Study area

Zhoushan, located in China's largest archipelago, comprises 1,390 islands, with a total terrestrial area of 1440.12 km<sup>2</sup> (Figure 1), and it is a densely populated area. Moreover, located in the subtropical monsoon climate, the region's precipitation season is warm (rainfall accounts for 45%), and occurs from June to September. The annual rainfall is between 980.7 and 1355.2 mm, the evaporation is between 1208.7 and 1466.2 mm, and the annual runoff depth about 44% less than that in continental areas of the same latitude in China (Xuan *et al.* 2020). Notably, Zhoushan faces a water crisis, as evidenced by a per capita volume of 600 m<sup>3</sup>, which is lower than the threshold proposed by the United Nations Food and Agriculture Organization (FAO). In fact, water levels less than 1,000 m<sup>3</sup>/capita are considered a severe constraint on socio-economic development by the FAO (Liu *et al.* 2012).

Regional development and protection are an important conflict for sustainable development in Zhoushan. Zhoushan is a rapidly developing island city with a population of  $1.158 \times 10^6$ . The mainland link project, a sea-crossing bridge, broke its adverse conditions with isolated locations in 2009. Subsequently, rapid urban sprawl has occurred in Zhoushan since 2010, and has increased the construction areas by 58.92 km<sup>2</sup>, from 2010 to 2015 (Fan *et al.* 2019b). Similarly, tourism has simultaneously grown with urbanization, thanks to the improved infrastructure. For example, more than 1,000 pristine

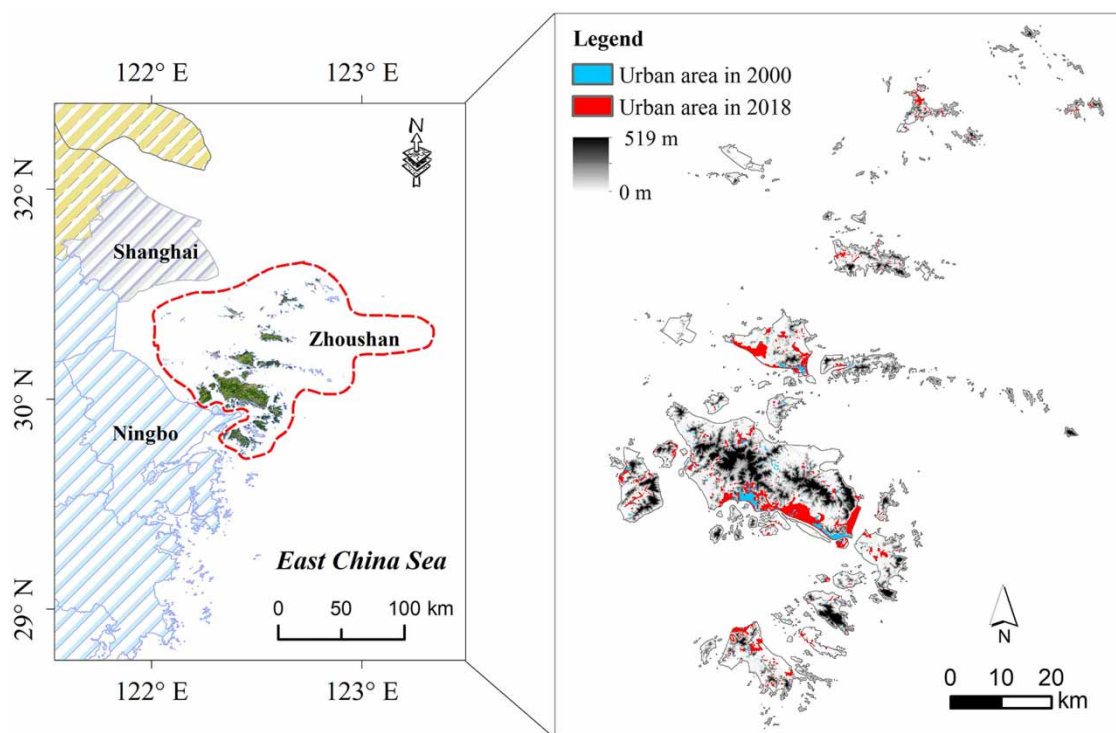

**Figure 1** | Location of the Zhoushan archipelago, indicating the region's boundary and urban area. Data source: Resource and Environmental Science and Data Center (RESDC).

landscapes have become popular tourist attractions by commercial exploitation, while the number of tourists increased from  $2.14 \times 10^8$  in 2010 to  $3.88 \times 10^8$  in 2015 (Zhoushan Municipal Statistics Bureau (ZMSB) 2019). All of these events have resulted in ecological issues (Fan *et al.* 2019a). As a representative island city in the coastal zone of China, with indicative economic growth and ecosystem changes, Zhoushan is an excellent choice for a case study.

## 2.2. Methods

We present a framing to enhance our interpretation of methods (Figure 2), which comprises three modules. The first module displays a conceptual network for interpreting the relationship between the human- and nature-system based on the virtual element nexus. The second module comprises a mathematical model, namely linear-weighted sum method, for assessing coevolutionary trends of target elements, while the third module involves two mathematical models, namely the impulse response function and coupling coordination model, for assessing the mutual impacts (including response period and the ability to adapt) with respect to target elements.

### 2.2.1. A conceptual network for interpreting the elements nexus for a system

The literature meaning of a network implies ‘a means of connection between virtual nodes in a series’. Similar to the morphological connection in topology, systematic elements, such as natural resources, social management and economic activities, are conceptualized to be virtual nodes. The links or edges capture the connections of nodes to one another (Liu *et al.* 2015). This conceptual network is a bridge to interpret the element nexus for a socio-ecological system.

We observed a nexus of three virtual nodes, namely tourism, urbanization and water security, for Zhoushan (Figure 3). Urbanization and tourism are the two most typical controlling factors for the island development dimension, while water security is a typical controlling factor for island protection. Island development calls for abundant water resource support. Conversely, island development gives feedback for island protection, for example, water facilities benefit from investment from construction activities, while water systems are exposed to increasing risk with respect to pollution and exhaustion (Gu *et al.* 2018).

According to the characteristics regarding the aforementioned three target elements, we further decompose them into 12 criteria (Figure 3). It is an important step to clarify the characteristics of these abstract elements in their literal meaning to reveal their mutual nexus and to guide parameter selection in the next workflow. Tourism is an identifiable nationally important industry that involves the provision of transportation, accommodation, recreation, food, and related services (Leiper 1979). The characteristics of tourism are generally portrayed in two dimensions, including enterprises’ operation and maintenance and tourists’ activity, which subsequently can be quantified by four indicators: tourism scale (Kasim 2006), tourism income (Beckels *et al.* 2012), tourism enterprises (Kilipiris & Zardava 2012) and tourism benefits (Pratt 2015). Urbanization refers to the population concentration in urban areas during certain periods of time, while at the same time, urban material and spiritual civilization keeps extending to surrounding rural areas during the process and producing new spatial patterns

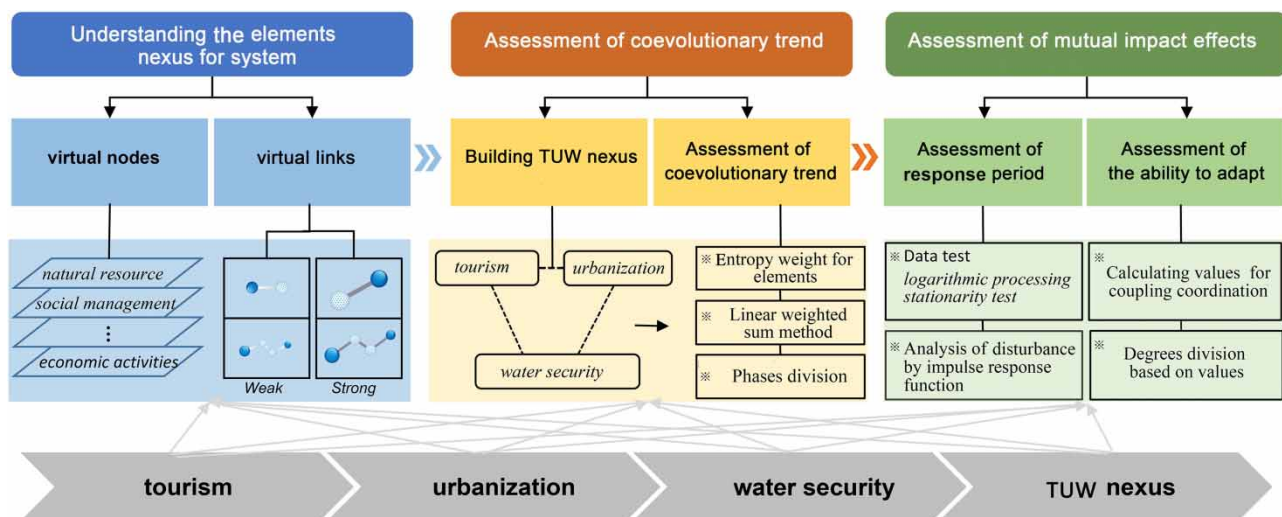

**Figure 2** | A framing to enhance our interpretation of methods.



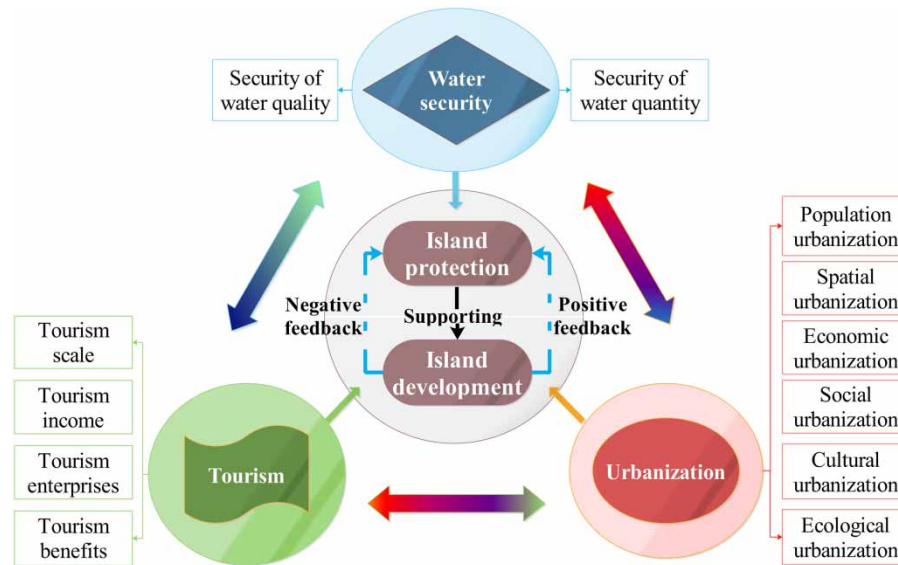

**Figure 3** | Nexus of elements, namely tourism, urbanization and water security, for Zhoushan.

and landscapes along with continuous changes in the regional industrial structure (Gu *et al.* 2012). The general characteristics of urbanization mainly include six dimensions: population agglomeration (Shen *et al.* 2012), rapid economic development (Choy *et al.* 2013), changes in residents' lifestyles (Muchadenyika & Williams 2016), enhancing the well-being of society (Supriyadi *et al.* 2012), transformation of regional land covers, and environment (Wang *et al.* 2001; Yu 2021). These characteristics subsequently can be quantified by corresponding indicators: population urbanization, economic urbanization, cultural urbanization, social urbanization, spatial urbanization and ecological urbanization. Water security is defined as the availability of an acceptable quantity and quality of water for health, livelihoods, ecosystems and production, coupled with an acceptable level of water-related risks to people, environments and economies (Grey & Sadoff 2007). The general characteristics of water security mainly include two indicators: security of water quality (Li *et al.* 2016) and security of water quantity (Zeng *et al.* 2013).

### 2.2.2. Indicators selection and data sources

The ideal quantitative expression of a system calls for comprehensive indicators. However, many factors restrict indicator selection in the actual operation process, such as the availability of data. In this section, referencing published literature, we list an experience-based indicator collection following the principles of representativeness and availability of data (Zhang *et al.* 2012; Gao *et al.* 2013, 2016; Li *et al.* 2013; Liu *et al.* 2014; Shu *et al.* 2015; Tang *et al.* 2017).

This indicator set includes 3 target elements, 12 detailed criteria and 55 parameters, as shown in Table 1. The changes in the target elements reflect the stability fluctuation of the system. The function for combined weighted systems of 55 parameters is to quantify the extent of fluctuation. Subsequently, water security changes can be diagnosed by comparing the degree of fluctuation values, in the annual temporal dimension.

Moreover, we assign an entropy weight for each indicator, and entropy weight has been proven to be an objective method compared with the pairwise comparison method (Wang *et al.* 2014) for giving indicator weight in assessment of tourism economic vulnerability, urban flood hazard and water quality (Zou *et al.* 2006; Sepehri *et al.* 2019; Huang *et al.* 2021).

### 2.2.3. Quantitative assessment of target elements and their impact relationship

**2.2.3.1. Model for assessment of coevolutionary trends.** The evolutionary trend of the three target elements is calculated by the linear weighted sum method. Summarily, this method makes a linear combination of parameters on the basis of their weights, and synthesizes a comprehensive value (Wang *et al.* 2019), as shown in Equations (1–3).

$$f(x) = \sum_{j=1}^n w_j x'_j \quad (1)$$

**Table 1** | Indicators and weights for socio-ecological system in the Zhoushan

| Target elements        | Criteria for elements                | Parameters                                                                          | Parameters contribution | Weight of parameters |
|------------------------|--------------------------------------|-------------------------------------------------------------------------------------|-------------------------|----------------------|
| Tourism ( $x$ )        | Tourism scale ( $x_1$ )              | Number of domestic tourists ( $x_{11}$ )                                            | +                       | 0.0933               |
|                        |                                      | Number of inbound tourists ( $x_{12}$ )                                             | +                       | 0.0918               |
|                        |                                      | Tourist density ( $x_{13}$ )                                                        | +                       | 0.0933               |
|                        | Tourism income ( $x_2$ )             | Domestic tourism revenue ( $x_{21}$ )                                               | +                       | 0.1003               |
|                        |                                      | Foreign exchange income from tourism ( $x_{22}$ )                                   | +                       | 0.0844               |
|                        |                                      | Per capita tourism income ( $x_{23}$ )                                              | +                       | 0.0975               |
|                        | Tourism enterprises ( $x_3$ )        | Number of travel agencies ( $x_{31}$ )                                              | +                       | 0.0781               |
|                        |                                      | Number of star hotels ( $x_{32}$ )                                                  | +                       | 0.0630               |
|                        |                                      | Number of A-grade scenic spots ( $x_{33}$ )                                         | +                       | 0.0967               |
|                        | Tourism benefits ( $x_4$ )           | Proportion of total tourism revenue in GDP ( $x_{41}$ )                             | +                       | 0.0888               |
|                        |                                      | Proportion of tourism employees ( $x_{42}$ )                                        | +                       | 0.1126               |
| Urbanization ( $y$ )   | Population urbanization ( $y_1$ )    | Proportion of urban population ( $y_{11}$ )                                         | +                       | 0.0380               |
|                        |                                      | Proportion of employees in secondary industries ( $y_{12}$ )                        | +                       | 0.0229               |
|                        |                                      | Proportion of employees in tertiary industries ( $y_{13}$ )                         | +                       | 0.0260               |
|                        |                                      | Urban population density ( $y_{14}$ )                                               | +                       | 0.0284               |
|                        | Spatial urbanization ( $y_2$ )       | Built-up area per capita ( $y_{21}$ )                                               | +                       | 0.0188               |
|                        |                                      | Urban road area per capita ( $y_{22}$ )                                             | +                       | 0.0478               |
|                        |                                      | Urbanization rate of land ( $y_{23}$ )                                              | +                       | 0.0244               |
|                        | Economic urbanization ( $y_3$ )      | Per capita GDP ( $y_{31}$ )                                                         | +                       | 0.0421               |
|                        |                                      | Proportion of secondary industries in GDP ( $y_{32}$ )                              | +                       | 0.0280               |
|                        |                                      | Proportion of tertiary industries in GDP ( $y_{33}$ )                               | +                       | 0.0410               |
|                        |                                      | Per capita gross industrial output value ( $y_{34}$ )                               | +                       | 0.0440               |
|                        | Social urbanization ( $y_4$ )        | Investment in fixed assets ( $y_{35}$ )                                             | +                       | 0.0427               |
|                        |                                      | Per capita disposable income of urban residents ( $y_{41}$ )                        | +                       | 0.0463               |
|                        |                                      | Total retail consumption per capita ( $y_{42}$ )                                    | +                       | 0.0424               |
|                        |                                      | Proportion of non-food excluded expenditure of urban residents ( $y_{43}$ )         | +                       | 0.0272               |
|                        |                                      | Number of medical and health institutions ( $y_{44}$ )                              | +                       | 0.0565               |
|                        |                                      | Number of buses owned by ten thousand people ( $y_{45}$ )                           | +                       | 0.0378               |
|                        |                                      | Number of college students per ten thousand people ( $y_{51}$ )                     | +                       | 0.0391               |
|                        |                                      | Number of libraries ( $y_{52}$ )                                                    | +                       | 0.0938               |
|                        | Cultural urbanization ( $y_5$ )      | Number of cultural centers ( $y_{53}$ )                                             | +                       | 0.0553               |
|                        | Ecological urbanization ( $y_6$ )    | Per capita park green area ( $y_{61}$ )                                             | +                       | 0.0513               |
|                        |                                      | Green coverage rate of built up area ( $y_{62}$ )                                   | +                       | 0.0359               |
|                        |                                      | Harmless treatment rate of municipal solid waste ( $y_{63}$ )                       | +                       | 0.0460               |
|                        |                                      | Investment in environmental protection ( $y_{64}$ )                                 | +                       | 0.0644               |
| Water security ( $z$ ) | Security of water quality ( $z_1$ )  | Water quality standard rate of centralized drinking water source ( $z_{11}$ )       | +                       | 0.0615               |
|                        |                                      | Water quality up to standard rate of water environmental function area ( $z_{12}$ ) | +                       | 0.0450               |
|                        |                                      | Standard rate of industrial waste-water ( $z_{13}$ )                                | +                       | 0.0581               |
|                        |                                      | Waste-water discharge amount ( $z_{14}$ )                                           | –                       | 0.0760               |
|                        |                                      | COD discharge amount ( $z_{15}$ )                                                   | –                       | 0.0607               |
|                        |                                      | Ammonia nitrogen discharge amount ( $z_{16}$ )                                      | –                       | 0.0621               |
|                        |                                      | Urban sewage treatment rate ( $z_{17}$ )                                            | +                       | 0.0855               |
|                        | Security of water quantity ( $z_2$ ) | Water yield modulus ( $z_{21}$ )                                                    | +                       | 0.0333               |
|                        |                                      | Water supply modulus ( $z_{22}$ )                                                   | +                       | 0.0385               |
|                        |                                      | Water resources per capita ( $z_{23}$ )                                             | +                       | 0.0314               |
|                        |                                      | Water consumption per capita ( $z_{24}$ )                                           | –                       | 0.0376               |
|                        |                                      | Development and utilization rate of water resources ( $z_{25}$ )                    | –                       | 0.0209               |
|                        |                                      | Water consumption rate ( $z_{26}$ )                                                 | –                       | 0.0549               |
|                        |                                      | Water consumption per 10,000 yuan GDP ( $z_{27}$ )                                  | –                       | 0.0411               |
|                        |                                      | Comprehensive production capacity of tap water ( $z_{28}$ )                         | +                       | 0.0347               |
|                        |                                      | Total urban water supply ( $z_{29}$ )                                               | +                       | 0.0353               |

(Continued.)

Table 1 | Continued

| Target elements | Criteria for elements | Parameters                                         | Parameters contribution | Weight of parameters |
|-----------------|-----------------------|----------------------------------------------------|-------------------------|----------------------|
|                 |                       | Water use popularity rate ( $z_{210}$ )            | +                       | 0.0382               |
|                 |                       | Water saving irrigation area ( $z_{211}$ )         | +                       | 0.0519               |
|                 |                       | Controlling the area of soil erosion ( $z_{212}$ ) | +                       | 0.0636               |
|                 |                       | Investment in water conservancy ( $z_{213}$ )      | +                       | 0.0676               |

Note: '+' and '-' denote a positive and negative indicator for the elements, respectively.

We extract the raw data set of these indicators from statistical bulletins in Zhoushan, which refer to the realm of economic and social development, environmental situation and water resources, in the period 2001–2016.

\*Statistical yearbook of Zhoushan, <http://zstj.zhoushan.gov.cn/col/col1559852/index.html>. Accessed January 5, 2021.

\*Water resources bulletin of Zhejiang province, <http://slt.zj.gov.cn/col/col1229243017/index.html>. Accessed 10 March 2022.

\*Statistical bulletin of national economic and social development of Zhoushan, <http://zstj.zhoushan.gov.cn/col/col1559853/index.html>. Accessed January 5, 2021.

\*Environmental situation bulletin of Zhoushan, <http://xxgk.zhoushan.gov.cn/col/col1229294458/index.html>. Accessed 10 March 2022.

$$g(y) = \sum_{j=1}^n w_j y'_j \quad (2)$$

$$h(z) = \sum_{j=1}^n w_j z'_j \quad (3)$$

where  $f(x)$ ,  $g(y)$  and  $h(z)$  indicate time series data of the target elements regarding tourism, urbanization and water security, respectively.  $w_j$  represents the weight of each parameter, while all criteria for the elements including  $x'_j$ ,  $y'_j$  and  $z'_j$ , are normalized ranging from 0 to 1, indicating parameters for tourism, urbanization and water security, respectively.

In a further step, we evaluated changes in the annual value of each target element, and the dominant elements of TUV nexus system changes were identified as those whose annual changes exceeded values by 0.1. In practice, the function of this step is to reveal coevolutionary trends for the TUV nexus system in Zhoushan.

**2.2.3.2. Model for assessment of the ability to adapt.** Coupling coordination means a process of dynamic systemic balance to maintain a positive trend by interactive adaptation of its inner elements to realize a disorder to order (Liu *et al.* 2005). We measure the interactive adaptation among the target elements using a coupling coordination degree (CCD) model, as shown in Equations (4)–(6).

$$C = \left\{ \frac{f(x) \times g(y) \times h(z)}{[(f(x) + g(y) + h(z))/3]^3} \right\}^{1/3} \quad (4)$$

$$T = \alpha f(x) + \beta g(y) + \gamma h(z) \quad (5)$$

$$D = \sqrt{T \times C} \quad (6)$$

where  $C$  is the value of the coupling degree, ranging from 0 to 1, and  $T$  is the comprehensive value of the three elements.  $D$  denotes the value of coupling coordination degree, ranging from 0 to 1, with a higher  $D$  value implying a stronger interactive effect among the three elements.  $\alpha$ ,  $\beta$  and  $\gamma$  indicate undetermined coefficients. The sum of their values is 1, whereas their weights are given as 0.3, 0.3 and 0.4, respectively.

Moreover, the value of CCD, ranging from 0 to 1, was classified into five grades at an interval of 0.2, namely low coordination, slight coordination, moderate coordination, high coordination and perfect coordination, respectively.

**2.2.3.3. Model for assessment of respond period.** The vector auto-regression (VAR) method belongs to the impulse-response function, as shown in Equations (7) and (8). This model has been widely selected to analyze the response periods of one variable suffering disturbance from another variable. The detailed mathematical induction of the impulse response

function can be retrieved from [Chinco \(2015\)](#).

$$\begin{bmatrix} xt \\ yt \\ Zt \end{bmatrix} = \begin{pmatrix} \gamma_{x,x} & \gamma_{x,y} \\ \gamma_{y,x} & \gamma_{y,y} \\ \Gamma & Zt-1 \end{pmatrix} \begin{bmatrix} xt-1 \\ yt-1 \end{bmatrix} + \begin{bmatrix} \varepsilon_{x,t} \\ \varepsilon_{y,t} \end{bmatrix} \quad (7)$$

$$Imp_x(h) = \Gamma^j C_x \quad (8)$$

where  $x$  is a shocked variable and  $h$  represents a response period (a lagged value) for this shocked variable.  $\Gamma$  indicates a coefficient matrix related to the fluctuation of variable  $x$ ,  $C_x$  is a matrix related to a rescaled vector of shocks, while  $Imp_x(h)$  denotes response values for the shocked variable  $x$  in periods of  $h$ .

We preprocess raw data, including logarithmic processing and stationarity tests, and prior to operation of the impulse response function in Eviews 9.0 to avoid data mistakes that refer to interference of heteroscedasticity and the phenomenon of pseudolinear regression, respectively. Then, we select a cointegration test to check the coexisting relationship among these time series data. In the successfully preprocessed clean datasets  $f(x)$ ,  $g(y)$  and  $h(z)$ , are marked as  $lf$ ,  $lg$  and  $lh$  respectively.

### 3. RESULTS AND DISCUSSION

#### 3.1. Coevolutionary trends of water security, urbanization and tourism

Evolutionary trend analysis revealed an overall upward trend of target elements ([Figure 4](#)). Nevertheless, the upward trend of water security exhibited a significant collapse in 2010. Similarly, its equilibrium changes were divided into two periods (2001–2009 and 2010–2016).

Specifically, the annual values of tourism and urbanization increased from 0.0575 to 0.9296 and 0.1144 to 0.8960, respectively, in the study period. Water security showed an upward fluctuation increase, from 0.5994 to 0.8263 in 2011 and 2016, respectively. Notably, we observed a tipping point of regime transformation (a sharp collapse of values) in water security in the temporal node of 2010. Subsequently, values of water security began to exhibit a lower level than that for urbanization and tourism after the temporal nodes of 2011 and 2013, respectively.

#### 3.2. Coupling coordination degree of water security, urbanization and tourism

Notably, the values of coupling coordination for target elements decreased in 2011, but increased from 0.1591 to 0.7484, across the study periods. Similarly, the CCD of target elements maintained a stable upward trend, which exhibited an improvement from low coordination in 2001 to high coordination in 2016 ([Figure 5](#)).

#### 3.3. Response period of water security impacted by tourism and urbanization

In this section, we present the results regarding the shock response of water security impacted by tourism and urbanization. Subsequently, we discuss the existing impact caused by island development on water security to increase knowledge about water security. We present a framework to enhance our interpretation ([Figure 6](#)).

##### 3.3.1. Shock response occurred in water security to tourism and urbanization

Notably, water security was positively correlated with tourism, but negatively correlated with urbanization. The target elements show a long-term linear relationship from the stationary test, as shown in [Table 2](#). Consistently, the analysis of interactive disturbance of target elements by VAR model shows that the most significant positive and negative impacts of shock response occurred in water security to tourism ([Figure 7\(e\)](#)), and water security to urbanization ([Figure 7\(f\)](#)), respectively.

##### 3.3.2. The effects of tourism growth on water carrying capacity

Water security exhibited a positive response to tourism. As shown in [Figure 6\(a1\)](#), a one standard deviation shock to water security, from tourism, caused a maximum response value of water security that reached 0.0724, over a 1-year lag period. The response value then showed an obvious downward trend, and returned to the original value of 0 over an 8-year period.

Water carrying capacity has benefited from moderate tourism construction. The tourism sector has strived to avert any water-related crisis, and this effort has included diversion projects and water desalination to adapt to soaring tourist numbers in the tourism season ([Gu et al. 2018](#); [Zhu et al. 2018](#)). A continental water diversion project has provided enough



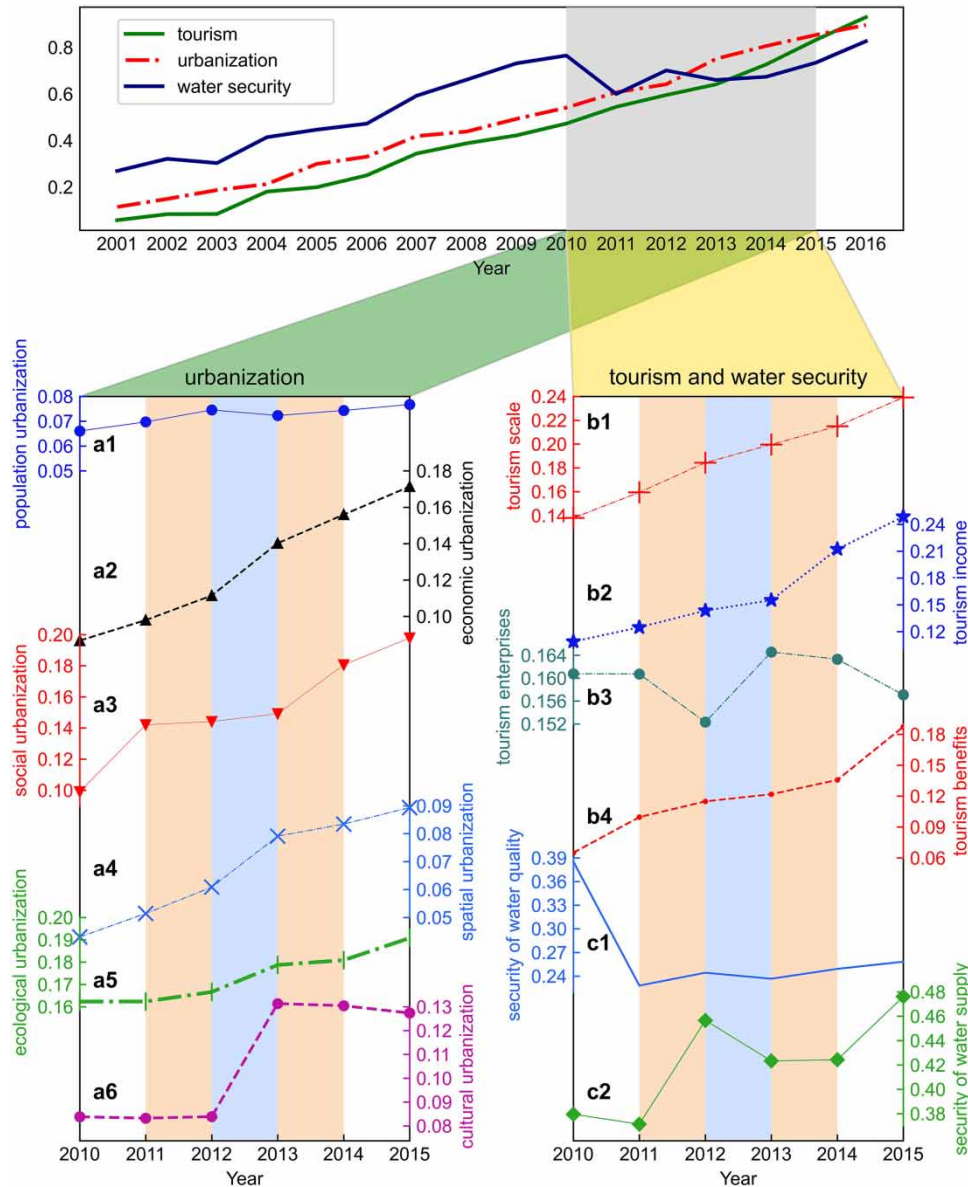

**Figure 4** | Trends across tourism, urbanization and water security elements in Zhoushan.

water for Putuo Island in Zhoushan, the largest religious venue for Kwan-yin culture in China, which has enabled it to increase the number of tourists from 1.673 million in 2001 to 7.497 million in 2016 (ZMSB 2019). Moreover, the environmental protection administration of Zhoushan (EPAZ) determines to implement desalination in the tourism season (occurring between May and October), and these regulation measures have alleviated the periodic water crisis caused by soaring numbers of tourists on Miaozihu Island, one of the national ocean parks located in Zhoushan. As shown in Figure 6(c1), this island has experienced high-intensity tourism development, and is vulnerable in water storage (small terrestrial area with 2.64 km<sup>2</sup> and poor facilities).

Conversely, there is an attenuation trend regarding the positive impacts of tourism on water security. The solidified nexus between tourism and water security from artificial regulation may lead to the ability regarding self-adaption for a water system decrease in Zhoushan. Enterprises always pursue economic benefit, but mask implicit costs (consumption of public resources, such as ecosystem service) regarding ecosystem degradation in their activities (Xiao *et al.* 2011). Environmental economists have proposed terminology namely ‘free-riding’ and ‘Limit to growth’ to interpret this economic behavior (Liao & Yi 2021). These terms have revealed a phenomenon that human well-being stagnates despite economic growth.

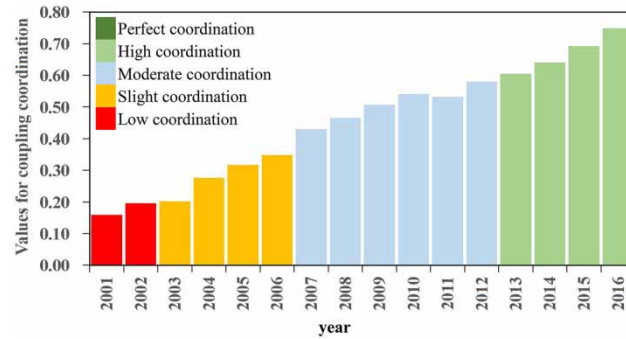

**Figure 5** | The coupling coordination degree among tourism, urbanization and water security across study periods.

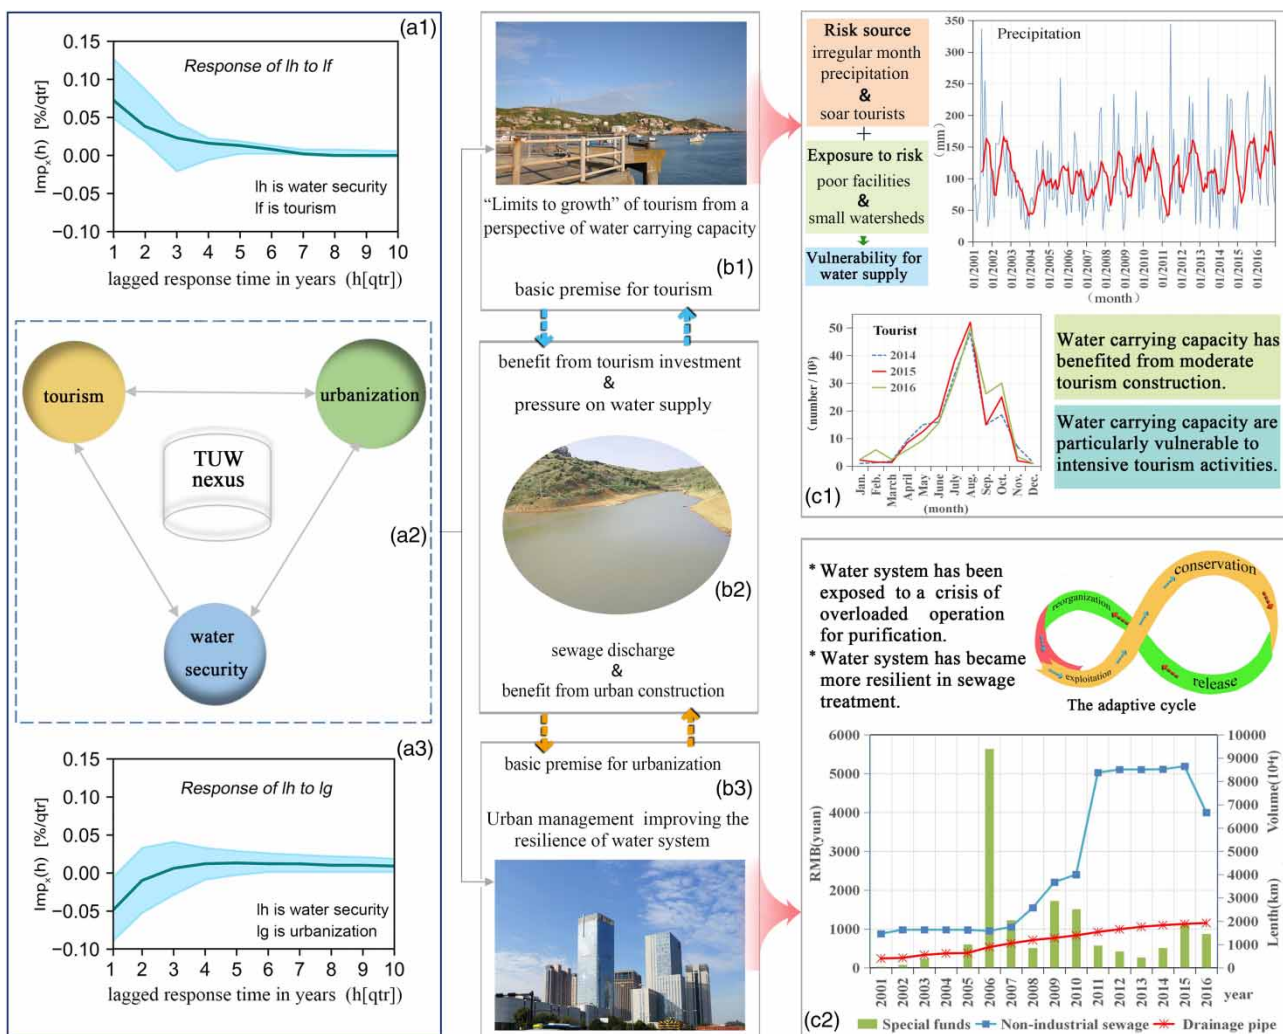

**Figure 6** | A framework describing our discussion in relation to the impacts of island development on water security.

In this context, island sustainable development needs to embrace moderate construction activities and entail tradeoffs in ecological protection and development against exceeding the carrying capacity of the water system.

Overall, moderate tourism development promotes water security, but tourism activities should be well controlled under the threshold of carrying capacity for the water system to achieve island sustainable development.

**Table 2** | Results of the stationary test

| Null hypothesis of co-integration relationship | Eigenvalue | Trace statistics | 5% critical value | P value | Maximum eigenvalue | 5% critical value | P value |
|------------------------------------------------|------------|------------------|-------------------|---------|--------------------|-------------------|---------|
| No                                             | 0.8270     | 38.1898          | 29.7971           | 0.0043  | 24.5662            | 21.1316           | 0.0158  |
| At most one                                    | 0.5439     | 13.6237          | 15.4947           | 0.0939  | 10.9910            | 14.2646           | 0.1547  |

Note: The time series elements of  $I_f$ ,  $I_g$  and  $I_h$  showed an integration of 1-order in the stationary test after logarithmic processing, which met the premised condition of subsequent co-integration analysis. Moreover, at 95% confidence level, the value of  $P < 0.05$  indicates that the null hypothesis of co-integration relationship was refused, while the value of  $P > 0.05$  indicates the null hypothesis was accepted. The linear relationship among water security ( $I_h$ ) and another two elements is shown in Equation (9):

$$I_h = 1.2134 I_f - 1.4328 I_g - 0.0433 \quad (9)$$

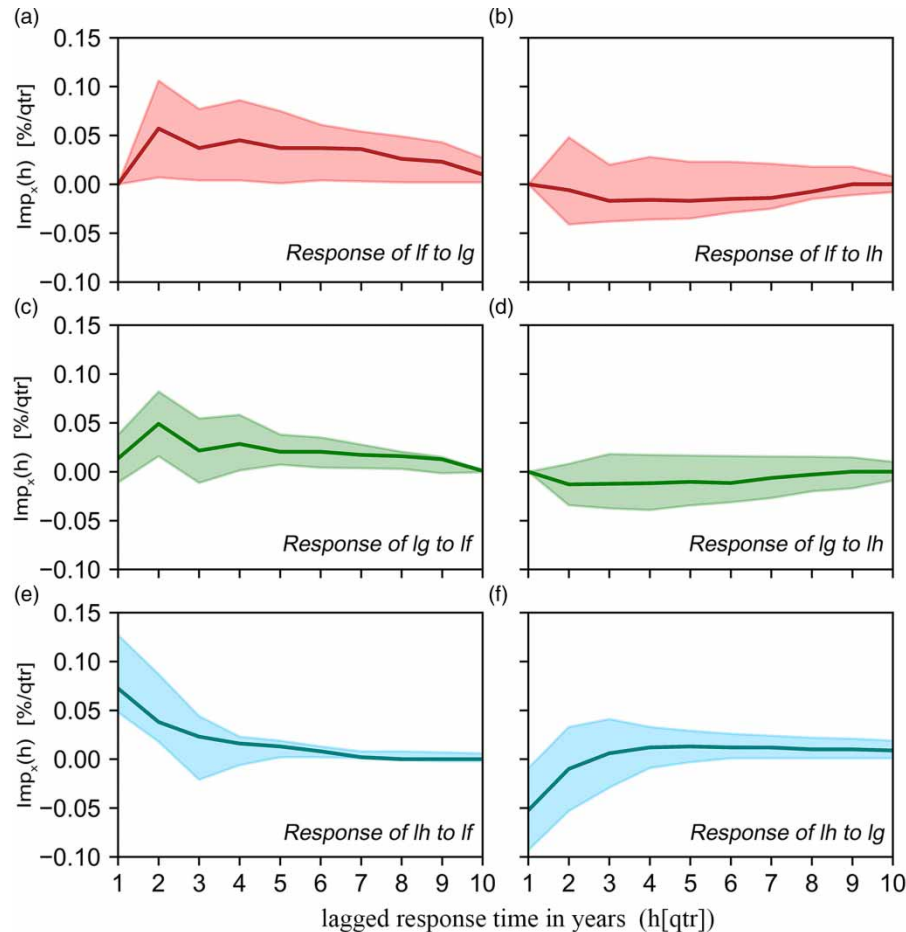

**Figure 7** | Results of the impulse response function test (curve reveals the response time for one element crashed by another element, in an unexpected  $1\sigma$  shock).

### 3.3.3. Urban construction improving the resilience of the water system

Water security exhibited a negative response to urbanization. As shown in Figure 6(a3), a one standard deviation shock in water security, from urbanization, caused the response value of water security to increase from  $-0.0524$  to  $0.0119$  over 1- and 7-year, lag periods, respectively.

The water system has been exposed to a crisis of overloaded operation for purification. Urbanization has promoted population increase, which has led to increased sewage production. As shown in Figure 6(c2), sewage discharge into non-industrial settings suddenly increased to a high volume with an annual mean of  $4.563 \times 10^7$  t during 2010–2016, in marked contrast to an annual mean of  $1.173 \times 10^7$  t during 2001–2009 (ZMSB 2019). Consequently, as previously mentioned in the adaptive cycle, the vulnerability of the water system falls from the equilibrium to collapse phase, driven by urbanization.

What's more, as shown in Figure 6(a3), the water system has become more resilient to adapt to the impacts of urbanization in Zhoushan. For example, the water system is more able to return to the designed capacity with respect to purification under the current environmental constraints, as well as emerging shocks from urbanization. This resilience has benefited from improvement activities supported by special funds for urban construction from the Zhoushan government. The Zhoushan government provided special funds worth 1.77 billion RMB to improve the urban sewerage system from 2006 to 2010 (ZMSB 2019). So far, this has enabled integration of the domestic sewers into the sewage treatment system. An official report from the Zhoushan government's website showed that 96.64% of all industrial sewage was treated by the sewerage collection system in 2011 and in marked contrast to unorganized discharge in historic periods (ZMSB 2019). Consequently, resiliently managing water systems in Zhoushan has carefully improved the sewage collection system, and limited exposure to pollutants from sewage discharge. This will also enhance the benefits of environmental management and help to realize the goal of sustainable development.

Overall, the water system has been exposed to a crisis caused by urban construction. But, the Zhoushan government has invested to improve local vulnerable water systems, controlled the previously unorganized discharge of domestic sewage, and put in place measures to monitor pollution and ensure environmental protection.

#### 4. CONCLUSIONS

In this study, we analyzed the impact of island development on water security from the perspective of the target element nexus in a socio-ecological system. We abstracted target elements into virtual nodes, and mathematical models quantified their mutual feedback and coupling coordination, on a temporal scale. This workflow is a bridge tool for us to understand the adaptation transitions of the water system in relation to disturbances driven by island development. This information is imperative for indicating the warning signals of water security loss.

Our main results showed that water security exhibited positive and negative shock responses to tourism and urbanization, over 1- and 7-year response periods, respectively. Furthermore, the equilibrium of the system has shifted from nature- to human-dominated since 2010. Interestingly, the water system has stably adapted to the interactions from island development, over the study period in Zhoushan, although it has experienced water shortages since 2010. We conclude that future urban planning programs should prioritize the water security of Zhoushan.

These findings provide a quantitative paradigm to island planners and decision makers for risk-informed management in relation to water systems in small island regions. The regime shift of interactive elements is simulated by signal recognition of adaptation fluctuation in the temporal dimension. The presented framework is flexible and can serve as a reference for the socio-ecological management of China's island cities, which face high-density anthropogenic activities and reduced resilience.

This study also had some limitations. Firstly, we were limited by insufficient data. This neglected spatial heterogeneity characteristics of the archipelago among individual islands. Secondly, we did not elaborate the topological relationship among the target elements, and the discussion only has a few significant proposals, due to the complexity of the socio-ecological system. Therefore, more comprehensive and scientific evaluation indicators are required to verify our findings. In future research, we will consider incorporating more influencing factors and data into the framework to verify our findings.

#### ACKNOWLEDGEMENTS

This work was supported by the National Key Research and Development Program of China (2017YFA0604902).

#### DATA AVAILABILITY STATEMENT

All relevant data are included in the paper or its Supplementary Information.

#### REFERENCES

- Chen, T. T., Hsu, W. L. & Chen, W. K. 2020 An assessment of water resources in the Taiwan Strait Island using the water poverty index. *Sustainability* **12** (6), 2351. <https://doi.org/10.3390/su12062351>.
- Chinco, A. 2015 Impulse-Response Functions for VARs (IRFFV) [EB/OL]. Available from: <http://www.alexchinco.com/impulse-response-functions-for-vars/> (accessed 1 January 2021).
- Choy, L. H. T., Lai, Y. & Lok, W. 2013 Economic performance of industrial development on collective land in the urbanization process in China: empirical evidence from Shenzhen. *Habitat International* **40**, 184–193. <https://doi.org/10.1016/j.habitatint.2013.04.003>.



- Diamantopoulou, P. & Voudouris, K. 2008 Optimization of water resources management using SWOT analysis: the case of Zakynthos Island, Ionian Sea, Greece. *Environmental Geology* **54** (1), 197–211. <https://doi.org/10.1007/s00254-007-0808-5>.
- Eeckels, B., Filis, G. & Leon, C. 2012 Tourism income and economic growth in Greece: empirical evidence from their cyclical components. *Tourism Economics* **18** (4), 817–834. <https://doi.org/10.5367/te.2012.0148>.
- Fan, C., Gui, F. & Zhao, S. 2019a Safety degree analysis of urban heat-island in Zhoushan Island. *Marine Sciences* **43** (10), 134–141.
- Fan, C., Gui, F. & Zhao, S. 2019b Spatial characteristics of island urban expansion and landscape ecological evolution: a case of the Zhoushan Island. *Marine Science Bulletin* **38** (4), 447–454.
- Gao, N., Ma, Y., Li, T. & Bai, K. 2013 Study on the coordinative development between tourism industry and urbanization based on coupling model A case study of Xi'an. *Tourism Tribune* **28** (1), 62–68.
- Gao, Y., Ma, Y. & Liu, J. 2016 Study on the coupling coordinative development and types among tourism, urbanization and ecological system: a case study of Beijing-Tianjin-Hebei area. *Journal of Shaanxi Normal University Natural Science Edition* **44** (5), 109–118.
- Grey, D. & Sadoff, C. W. 2007 Sink or swim? water security for growth and development. *Water Policy* **9** (6), 545–571. <https://doi.org/10.2166/wp.2007.021>.
- Gu, C., Wu, L. & Cook, I. 2012 Progress in research on Chinese urbanization. *Frontiers of Architectural Research* **1** (2), 101–149. <https://doi.org/10.1016/j.foar.2012.02.013>.
- Gu, H., Guo, Q., Lin, P., Bai, L., Yang, S., Sitharam, T. G. & Liu, J. 2018 Feasibility study of coastal reservoirs in the Zhoushan Islands, China. *Journal of Coastal Research* **35** (4), 835–841. <https://doi.org/10.2112/JCOASTRES-D-18-00091.1>.
- Heinrich Blechinger, P. F. & Shah, K. U. 2011 A multi-criteria evaluation of policy instruments for climate change mitigation in the power generation sector of Trinidad and Tobago. *Energy Policy* **39** (10), 6331–6343. <https://doi.org/10.1016/j.enpol.2011.07.034>.
- Huang, C., Lin, F., Chu, D., Wang, L., Liao, J. & Wu, J. 2021 Spatiotemporal evolution and trend prediction of tourism economic vulnerability in china's major tourist cities. *ISPRS International Journal of Geo-Information* **10** (10). <https://doi.org/10.3390/ijgi10100644>.
- Kasim, A. 2006 The need for business environmental and social responsibility in the tourism industry. *International Journal of Hospitality & Tourism Administration* **7** (1), 1–22. <https://doi.org/10.1300/J149v07n01>.
- Kilipiris, F. & Zardava, S. 2012 Developing sustainable tourism in a changing environment: issues for the tourism enterprises (Travel agencies and hospitality enterprises). *Procedia – Social and Behavioral Sciences* **44**, 44–52. <https://doi.org/10.1016/j.sbspro.2012.05.003>.
- Lehmann, S. 2018 Implementing the urban nexus approach for improved resource-efficiency of developing cities in Southeast-Asia. *City, Culture and Society* **13** (10), 46–56. <https://doi.org/10.1016/j.ccs.2017.10.003>.
- Leiper, N. 1979 The framework of tourism. Towards a definition of tourism, tourist, and the tourist industry. *Annals of Tourism Research* **6** (4), 390–407. [https://doi.org/10.1016/0160-7383\(79\)90003-3](https://doi.org/10.1016/0160-7383(79)90003-3).
- Li, J., Zhu, X., Li, J. & Xu, M. 2013 Relationships between urbanization and water resource utilization in Dongting Lake District of South-central China. *Chinese Journal of Applied Ecology* **24** (6), 1677–1685.
- Li, Y., Li, Y. & Wu, W. 2016 Threshold and resilience management of coupled urbanization and water environmental system in the rapidly changing coastal region. *Environmental Pollution* **208**, 87–95. <https://doi.org/10.1016/j.envpol.2015.08.042>.
- Li, Y., Yin, B. C. & Li, Y. F. 2019 Early warning signals for landscape connectivity and resilient conservation solutions. *Land Degradation and Development* **30** (1), 73–83. <https://doi.org/10.1002/ldr.3206>.
- Liao, S. & Yi, S. 2021 Modeling and analyzing knowledge transmission process considering free-riding behavior of knowledge acquisition: a waterborne disease approach. *Physica A: Statistical Mechanics and Its Applications* **569**, 125769. <https://doi.org/https://doi.org/10.1016/j.physa.2021.125769>.
- Liu, Y. B., Li, R. D. & Song, X. F. 2005 Analysis of coupling degrees of urbanization and ecological environment in China. *Journal of Natural Resources* **20** (1), 105–112.
- Liu, D. D., Chen, X. H. & Nakato, T. 2012 Resilience assessment of water resources system. *Water Resources Management* **26** (13), 3743–3755. <https://doi.org/10.1007/s11269-012-0100-7>.
- Liu, B., Tao, H., Kong, B. & He, B. 2014 Research on the water resource security and its temporal-spatial distributions of Yunnan Province. *Journal of Natural Resources* **29** (3), 454–465.
- Liu, J., Mooney, H., Hull, V., Davis, S. J., Gaskell, J., Hertel, T., Lubchenco, J., Seto, K. C., Gleick, P., Kremen, C. & Li, S. 2015 Systems integration for global sustainability. *Science* **347** (6225), 1258832. <https://doi.org/10.1126/science.1258832>.
- Liu, J. G., Hull, V., Godfray, H. C. J., Tilman, D., Gleick, P., Hoff, H., Pahl-Wostl, C., Xu, Z. C., Chung, M. G., Sun, J. & Li, S. X. 2018 Nexus approaches to global sustainable development. *Nature Sustainability* **1** (9), 466–476. <https://doi.org/10.1038/s41893-018-0135-8>.
- Luo, P. Z., Yang, Y., Wang, H. T., Gu, Y. F., Xu, J. & Li, Y. 2018 Water footprint and scenario analysis in the transformation of Chongming into an international eco-island. *Resources, Conservation and Recycling* **132** (7), 376–385. <https://doi.org/10.1016/j.resconrec.2017.07.026>.
- Ma, X., de Jong, M., Sun, B. Q. & Bao, X. 2020 Nouveauté or Cliché? assessment on island ecological vulnerability to tourism: application to Zhoushan, China. *Ecological Indicators* **113**, 106247. <https://doi.org/10.1016/j.ecolind.2020.106247>.
- Moglia, M., Perez, P. & Burn, S. 2008 Urbanization and water development in the Pacific Islands. *Development* **51** (1), 49–55. <https://doi.org/10.1057/palgrave.development.1100451>.
- Monrose, J. & Tota-Maharaj, K. 2018 Technological review of permeable pavement systems for applications in small island developing states. *Clean – Soil, Air, Water* **46** (9). <https://doi.org/10.1002/clen.201700168>.
- Muchadenyika, D. & Williams, J. J. 2016 Social change: urban governance and urbanization in Zimbabwe. *Urban Forum* **27** (3), 253–274. <https://doi.org/10.1007/s12132-016-9278-8>.



- Ni, X., Wu, Y. Q., Wu, J., Lu, J. & Wilson, P. C. 2012 Scenario analysis for sustainable development of Chongming Island : water resources sustainability. *Science of the Total Environment* **439**, 129–135. <https://doi.org/10.1016/j.scitotenv.2012.09.031>.
- Pratt, S. 2015 The economic impact of tourism in SIDS. *Annals of Tourism Research* **52**, 148–160. <https://doi.org/10.1016/j.annals.2015.03.005>.
- Schwerdtner Máñez, K., Husain, S., Ferse, S. C. A. & Máñez Costa, M. 2012 Water scarcity in the Spermonde Archipelago, Sulawesi, Indonesia: past, present and future. *Environmental Science and Policy* **23**, 74–84. <https://doi.org/10.1016/j.envsci.2012.07.004>.
- Sepehri, M., Malekinezhad, H., Hosseini, S. Z. & Ildoromi, A. R. 2019 Assessment of flood hazard mapping in urban areas using entropy weighting method: a case study in Hamadan city, Iran. *Acta Geophysica* **67** (5), 1435–1449. <https://doi.org/10.1007/s11600-019-00342-x>.
- Shen, L., Peng, Y., Zhang, X. & Wu, Y. 2012 An alternative model for evaluating sustainable urbanization. *Cities* **29** (1), 32–39. <https://doi.org/10.1016/j.cities.2011.06.008>.
- Shu, X. L., Gao, Y. B., Zhang, Y. X. & Yang, C. Y. 2015 Study on the coupling relationship and coordinative development between tourism industry and eco-civilization city. *China Population, Resources and Environment* **25** (3), 82–90.
- Smith, W. J. 2008 The place of rural, remote and least-wealthy small islands in international water development: the nexus of geography – technology sustainability in Chuuk State, Federated States of Micronesia. *The Geographical Journal* **174** (3), 251–268.
- South, G. R., Skelton, P. A., Veitayaki, J., Resture, A., Carpenter, C., Pratt, C. & Lawedrau, A. 2004 The global international waters assessment for the pacific islands: aspects of transboundary, water shortage, and coastal fisheries issues. *Ambio* **33** (1–2), 98–106. <https://doi.org/10.1579/0044-7447-33.1.98>.
- Strauß, S. 2011 Water conflicts among different user groups in South Bali, Indonesia. *Human Ecology* **39** (1), 69–79. <https://doi.org/10.1007/s10745-011-9381-3>.
- Stringer, L. C., Quinn, C. H., Le, H. T. V., Msuya, F., Pezzuti, J., Dallimer, M., Afionis, S., Berman, R., Orchard, S. E. & Rijal, M. L. 2018 A new framework to enable equitable outcomes: resilience and nexus approaches combined. *Earth's Future* **6** (6), 902–918. <https://doi.org/10.1029/2017EF000694>.
- Supriyadi, B., Sudarwanto, B. & Werdiningsih, H. 2012 In search of the power of Javanese culture against the cultural urbanization in Kotagede, Yogyakarta-Indonesia. *Procedia – Social and Behavioral Sciences* **68**, 676–686. <https://doi.org/10.1016/j.sbspro.2012.12.258>.
- Tang, H., Liu, Y. J. & Ma, X. F. 2017 Evaluation of coordinated development between tourism industry and new urbanization: a case study of Zhangjiajie. *Economic Geography* **37** (2), 216–233.
- van der Velde, M., Green, S. R., Vanclooster, M. & Clothier, B. E. 2007 Sustainable development in small island developing states: agricultural intensification, economic development, and freshwater resources management on the coral atoll of Tongatapu. *Ecological Economics* **61** (2–3), 456–468. <https://doi.org/10.1016/j.ecolecon.2006.03.017>.
- Wang, L., Lyons, J., Kanehl, P. & Bannerman, R. 2001 Impacts of urbanization on stream habitat and fish across multiple spatial scales. *Environmental Management* **28** (2), 255–266. <https://doi.org/10.1007/s0026702409>.
- Wang, Q., Lu, L. & Yang, X. 2014 Security assessment of water resources system for mountain resorts based on set pair analysis: a case study of Huangshan. *Geographical Research* **33** (6), 1059–1072.
- Wang, Q., Yin, M., Yang, X. & Yao, Z. 2019 Spatio-temporal evolution and impact mechanism of socioecological system vulnerability in poor mountainous tourist destinations: taking Dabie Mountain Area as example. *Acta Geographica Sinica* **74** (8), 1663–1679.
- Wang, Q., Li, Y. & Li, Y. 2021 Realizing a new resilience paradigm on the basis of land-water-biodiversity nexus in a coastal city. *Ocean and Coastal Management* **207** (9). <https://doi.org/10.1016/j.ocecoaman.2018.09.004>.
- White, I., Falkland, T., Perez, P., Dray, A., Metutera, T., Metai, E. & Overmars, M. 2007 Challenges in freshwater management in low coral atolls. *Journal of Cleaner Production* **15** (16), 1522–1528. <https://doi.org/10.1016/j.jclepro.2006.07.051>.
- Xiao, J. H., Yu, Q. D., Liu, K., Chen, D. J., Chen, J. & Xiao, J. N. 2011 Evaluation of the ecological security of island tourist destination and island tourist sustainable development: a case study of Zhoushan Islands. *Acta Geographica Sinica* **66** (6), 842–852.
- Xuan, D., Hu, Q., Wang, Y., Yang, H., Li, L. & Wang, L. 2020 Precipitation characteristic analysis of the Zhoushan Archipelago: from the view of MSWEP and rainfall merging. *Water (Switzerland)* **12** (3). <https://doi.org/10.3390/w12030829>.
- Yu, B. 2021 Ecological effects of new-type urbanization in China. *Renewable and Sustainable Energy Reviews* **135**, 110239. <https://doi.org/10.1016/j.rser.2020.110239>.
- Zeng, Z., Liu, J. & Savenije, H. H. G. 2013 A simple approach to assess water scarcity integrating water quantity and quality. *Ecological Indicators* **34**, 441–449. <https://doi.org/10.1016/j.ecolind.2013.06.012>.
- Zhang, S. W., Shi, P. J. & Wang, Z. J. 2012 Analysis of coupling between urbanization and water resource and environment of inland river basin in arid region: a case study of Shiyang River Basin. *Economic Geography* **32** (8), 142–148.
- Zhoushan Municipal Statistics Bureau 2019 *Zhoushan Statistical Yearbook (ZSY) [EB / OL]*. Available from: <http://zstj.zhoushan.gov.cn/col/col1228998393/index.html> (accessed 5 January 2021).
- Zhu, Z., Peng, D. & Wang, H. 2019 Seawater desalination in China: an overview. *Journal of Water Reuse and Desalination* **9** (2), 115–132. <https://doi.org/10.2166/wrd.2018.034>.
- Zou, Z. H., Yun, Y. & Sun, J. N. 2006 Entropy method for determination of weight of evaluating indicators in fuzzy synthetic evaluation for water quality assessment. *Journal of Environmental Sciences (China)* **18** (5), 1020–1023. [https://doi.org/10.1016/S1001-0742\(06\)60032-6](https://doi.org/10.1016/S1001-0742(06)60032-6).

First received 4 September 2021; accepted in revised form 17 February 2022. Available online 1 March 2022
